# Supplementary material for: Behaviour and molecular identification of Anopheles malaria vectors in Jayapura district, Papua province, Indonesia
Source: Springer Nature journal article supplement (doi:10.1186/s12936-016-1234-5), 2016-04-08
Supplement: MOESM2 [file 10027250]

Additional File. Table.

**Hourly collection of molecular species by collection method: Indoor HLC, Outdoor HLC, Animal-baited tent, and Backpack aspiration in each of 5 villages in Papua, Indonesia.** \*Kehiran I collections represent 3 nights of collection while all other villages took place over a single night
